# Supplementary material
Source: PubMed Central journal article supplement (PMC5125884)
Supplement: NIHMS818442-supplement-2.pdf [file NIHMS818442-supplement-2.pdf]

**Targeted Next Generation Sequencing of *CIC-DUX4* Soft Tissue Sarcomas Demonstrates Low Mutational Burden and Recurrent Chromosome 1p Loss**

Lorena Lazo de la Vega B.S., Daniel H. Hovelson M.S., Andi K. Cani M.S., Chia-Jen Liu M.S., Jonathan B. McHugh M.D., David R. Lucas M.D., Dafydd G. Thomas M.D. PhD., Rajiv M. Patel\* M.D., Scott A. Tomlins\* M.D. PhD.

**SUPPLEMENTARY INFORMATION**

|                                            |          |
|--------------------------------------------|----------|
| <b><u>Supplementary Figure Legends</u></b> | <b>1</b> |
| <b><u>Supplementary Figure 1</u></b>       | <b>2</b> |
| <b><u>Supplementary Table 1</u></b>        | <b>3</b> |
| <b><u>Supplementary Table 2</u></b>        | <b>4</b> |

**Supplementary Figure Legends**

**Fig. S1. Bidirectional Sanger Sequencing confirmation of prioritized mutations.**

Sanger sequencing was performed for all prioritized mutations with variant allele frequencies >15% across all profiled cases. Sanger traces of cases with their respective mutation are shown in both directions with the indicated nucleotide and amino acid changes noted. These mutations were not observed in any other case (data not shown).

**Case 1 TP53**  
D208fs

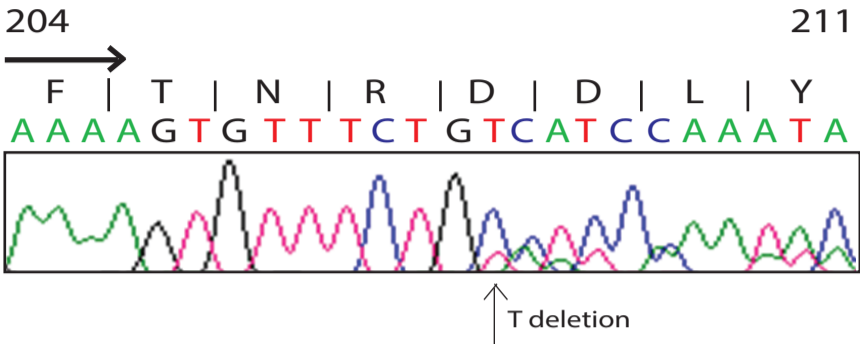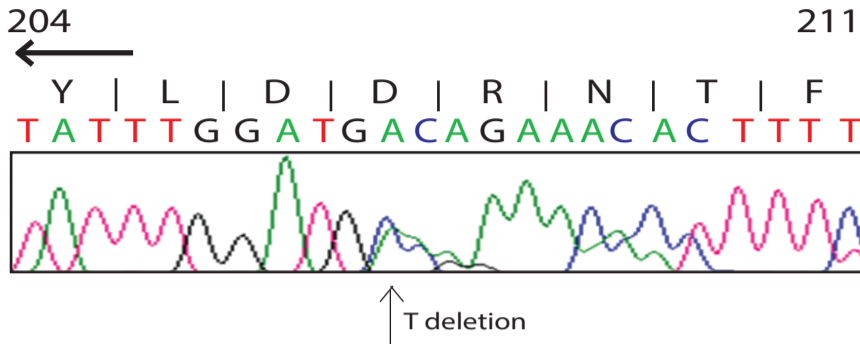

**Case 1 TP53**  
C238Y

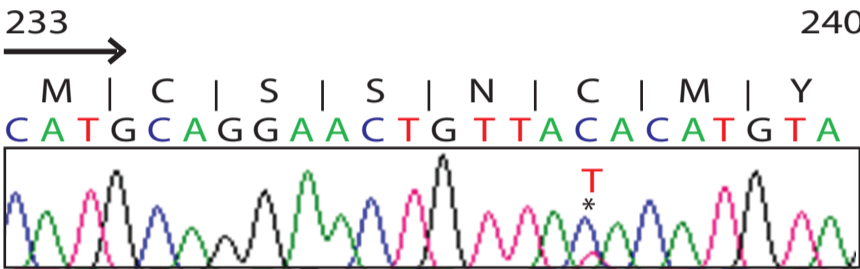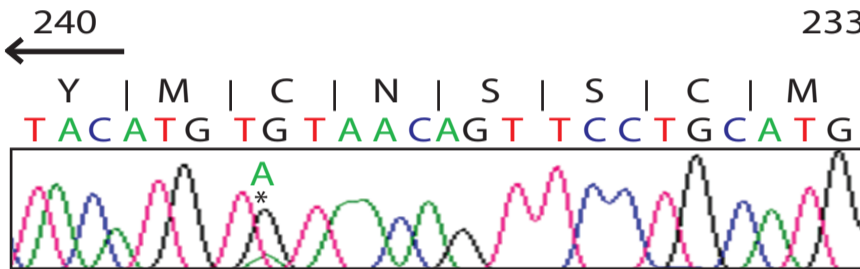

**Case 7B ARID1A**  
R693X

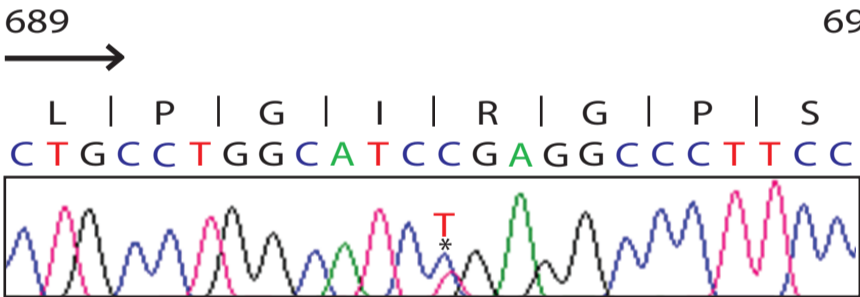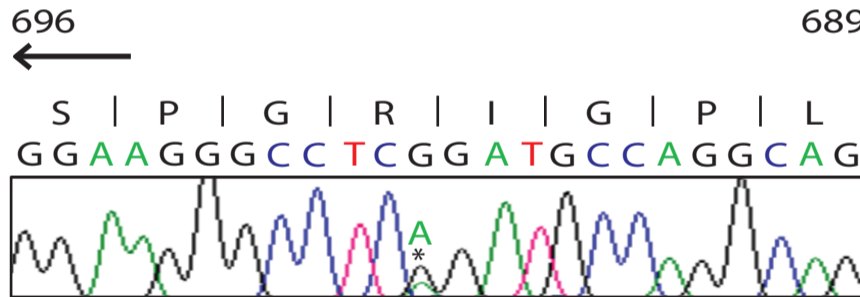

**Table S1. Sequencing statistics and for profiled CIC-DUX4 samples**

| Case           | Mapped Reads      | Mean Depth | Uniformity | % reads on target | Total Called variants <sup>1</sup> | Variants passing filtering <sup>2</sup> | Prioritized variants <sup>3</sup> |
|----------------|-------------------|------------|------------|-------------------|------------------------------------|-----------------------------------------|-----------------------------------|
| 1              | 9,465,769         | 566        | 95%        | 97%               | 1496                               | 5                                       | 2;                                |
| 2              | 10,854,865        | 670        | 86%        | 99%               | 1132                               | 2                                       | 0                                 |
| 3              | 8,924,168         | 537        | 85%        | 98%               | 2434                               | 3                                       | 0                                 |
| 4              | 8,846,125         | 548        | 87%        | 99%               | 1554                               | 2                                       | 0                                 |
| 5A             | 9,586,657         | 592        | 90%        | 99%               | 1199                               | 0                                       | 0                                 |
| 5B             | 8,363,000         | 514        | 88%        | 98%               | 1192                               | 0                                       | 0                                 |
| 6A             | 14,130,758        | 883        | 88%        | 99%               | 1137                               | 1                                       | 1;                                |
| 6B             | 13,322,079        | 828        | 89%        | 99%               | 1173                               | 0                                       | 0                                 |
| 7A             | 9,728,867         | 591        | 95%        | 98%               | 1177                               | 2                                       | 0                                 |
| 7B             | 10,256,404        | 636        | 95%        | 99%               | 1134                               | 2                                       | 1;                                |
| 8              | 9,923,117         | 614        | 94%        | 99%               | 1189                               | 4                                       | 0                                 |
| <b>Average</b> | <b>10,309,255</b> | <b>634</b> | <b>90%</b> | <b>98%</b>        | <b>1,347</b>                       | <b>2</b>                                | <b>&lt;1</b>                      |

Sequencing statistics for 11 CIC-DUX4 sarcomas (from 8 cases) profiled by next generation sequencing (NGS) using the Ion Ampliseq Comprehensive Cancer Panel (CCP), which targets 1,688,650 bases in 15,992 amplicons representing 409 cancer genes. Given are the number of mapped reads per sample, the mean read coverage depth over targeted bases, uniformity of mapped reads and the % reads on target, as well as the average called variants prior to any filtering.

<sup>1</sup>Variants called by automated low stringency variant calling. <sup>2</sup>Variants passing filtering of technical artifacts, poorly supported variants, germline SNPs and synonymous/non-coding variants. <sup>3</sup>Variants passing filtering described in <sup>2</sup> and prioritized as likely driving oncogenic or tumor suppressive mutations.

**Table S2. Somatic nonsynonymous mutations in CIC-DUX4 sarcomas identified by next generation sequencing**

| Case      | Location             | Gene                 | REF       | ALT      | AA Change       | Var. Allele Freq. | FAO         | FDP         | Transcript       | Nuc change       | ESP6500   | KG_FEB2012 | EXAC              | FSAF       | FSAR       | HRUN     |
|-----------|----------------------|----------------------|-----------|----------|-----------------|-------------------|-------------|-------------|------------------|------------------|-----------|------------|-------------------|------------|------------|----------|
| 1         | chr12:49444178       | <i>KMT2D</i>         | A         | T        | p.S1065T        | 0.3905            | 164         | 420         | NM_003482        | c.T3193A         | NA        | NA         | 0.00001653        | 51         | 113        | 1        |
|           | chr17:78320326       | <i>RNF213</i>        | C         | A        | p.L2731I        | 0.9515            | 255         | 268         | NM_001256071     | c.C8191A         | NA        | NA         | 0                 | 152        | 103        | 1        |
|           | chr20:39708747       | <i>TOP1</i>          | C         | T        | p.P120S         | 0.4758            | 265         | 557         | NM_003286        | c.C358T          | NA        | NA         | 0                 | 74         | 191        | 2        |
|           | <b>chr17:7577568</b> | <b><i>TP53</i></b>   | <b>C</b>  | <b>T</b> | <b>p.C238Y</b>  | <b>0.3157</b>     | <b>365</b>  | <b>1156</b> | <b>NM_00546</b>  | <b>c.G713A</b>   | <b>NA</b> | <b>NA</b>  | <b>0.00002471</b> | <b>209</b> | <b>156</b> | <b>1</b> |
|           | <b>chr17:7578226</b> | <b><i>TP53</i></b>   | <b>GT</b> | <b>G</b> | <b>p.D208fs</b> | <b>0.6758</b>     | <b>1338</b> | <b>1980</b> | <b>NM_000546</b> | <b>c.623delA</b> | <b>NA</b> | <b>NA</b>  | <b>0</b>          | <b>682</b> | <b>656</b> | <b>1</b> |
| 2         | chr7:151859963       | <i>KMT2C</i>         | T         | G        | p.S3567R        | 0.54              | 96          | 178         | NM_170606        | c.A10699C        | NA        | NA         | 0                 | 37         | 59         | 1        |
|           | chr12:49444845       | <i>KMT2D</i>         | C         | G        | p.C874S         | 0.35              | 123         | 354         | NM_003482        | c.G2621C         | NA        | NA         | 0                 | 70         | 53         | 1        |
| 3         | chr6:152712563       | <i>SYNE1</i>         | C         | T        | p.S2625N        | 0.48              | 529         | 1104        | NM_033071        | c.G7874A         | NA        | NA         | 0                 | 307        | 222        | 1        |
|           | chr6:160500777       | <i>IGF2R</i>         | G         | A        | p.A1882T        | 0.11              | 12          | 111         | NM_000876        | c.G5644A         | NA        | NA         | 0                 | 5          | 7          | 1        |
|           | chr9:139397766       | <i>NOTCH1</i>        | C         | T        | p.E1679K        | 0.14              | 24          | 169         | NM_017617        | c.G5035A         | NA        | NA         | 0                 | 2          | 22         | 2        |
| 4         | chr2:141459780       | <i>LRP1B</i>         | C         | A        | p.V2078L        | 0.41              | 37          | 90          | NM_018557        | c.G6232T         | NA        | NA         | 0                 | 26         | 11         | 2        |
|           | chr8:41834733        | <i>KAT6A</i>         | G         | A        | p.R386W         | 0.48              | 967         | 1995        | NM_006766        | c.C1156T         | NA        | NA         | 0                 | 417        | 550        | 1        |
| <b>6A</b> | <b>chr3:41266163</b> | <b><i>CTNNB1</i></b> | <b>G</b>  | <b>A</b> | <b>p.E54K</b>   | <b>0.11</b>       | <b>28</b>   | <b>245</b>  | <b>NM_001904</b> | <b>c.G160A</b>   | <b>NA</b> | <b>NA</b>  | <b>0</b>          | <b>10</b>  | <b>18</b>  | <b>2</b> |
| 7A        | chr12:49431186       | <i>KMT2D</i>         | G         | C        | p.A3318G        | 0.5132            | 214         | 417         | NM_003482        | c.C9953G         | NA        | NA         | 0                 | 106        | 108        | 1        |
| 7B        | chr12:49431186       | <i>KMT2D</i>         | G         | C        | p.A3318G        | 0.5247            | 170         | 324         | NM_003482        | c.C9953G         | NA        | NA         | 0                 | 82         | 88         | 1        |
|           | <b>chr1:27087503</b> | <b><i>ARID1A</i></b> | <b>C</b>  | <b>T</b> | <b>p.R693X</b>  | <b>0.3765</b>     | <b>157</b>  | <b>417</b>  | <b>NM_006015</b> | <b>c.C2077T</b>  | <b>NA</b> | <b>NA</b>  | <b>0</b>          | <b>84</b>  | <b>73</b>  | <b>2</b> |
| 8         | chr6:152201817       | <i>ESR1</i>          | C         | G        | p.T224S         | 0.1522            | 7           | 46          | NM_000125        | c.C671G          | NA        | NA         | 0                 | 4          | 3          | 2        |
|           | chr10:76788660       | <i>KAT6B</i>         | GGAA      | G        | p.1360_1360del  | 0.1441            | 67          | 465         | NM_012330        | c.4078_4080del   | NA        | NA         | 0                 | 15         | 52         | 2        |
|           | chr1:32741944        | <i>LCK</i>           | C         | T        | p.S213L         | 0.5197            | 158         | 304         | NM_005356        | c.C638T          | NA        | NA         | 0                 | 87         | 71         | 1        |
|           | chr9:139396829       | <i>NOTCH1</i>        | C         | T        | p.R1760H        | 0.5262            | 241         | 458         | NM_017617        | c.G5279A         | NA        | NA         | 0                 | 113        | 128        | 1        |

All high confidence somatic non-synonymous variants (see Methods) identified across 11 FFPE CIC-DUX4 sarcoma samples are shown. The location (hg19), reference (Ref.) and variant (Var.) alleles, amino acid (AA) change, variant allele frequency (Var Allele Freq. = FAO/FDP) are shown for each sample. Read level information (FAO= flow corrected variant allele containing reads, FDP=flow corrected read depth, FAO/FDP), function and transcript/nucleotide (Nuc) change are shown for each high confidence, somatic non-synonymous variant. Allele frequencies in normal populations (ESP6500, 1000 genomes project, and ExAC) are given. Variant allele support on both forward and reverse reads is given (FSAF=forward strand flow corrected variant allele calling reads; FSAR=reverse strand flow corrected variant allele calling reads). HRUN indicates the number of consecutive bases at the indicated variant allele position. Prioritized oncogenic/tumor suppressive mutations are bolded.
