# Supplementary material
Source: PubMed Central journal article supplement (PMC5125884)

**Figure 1**

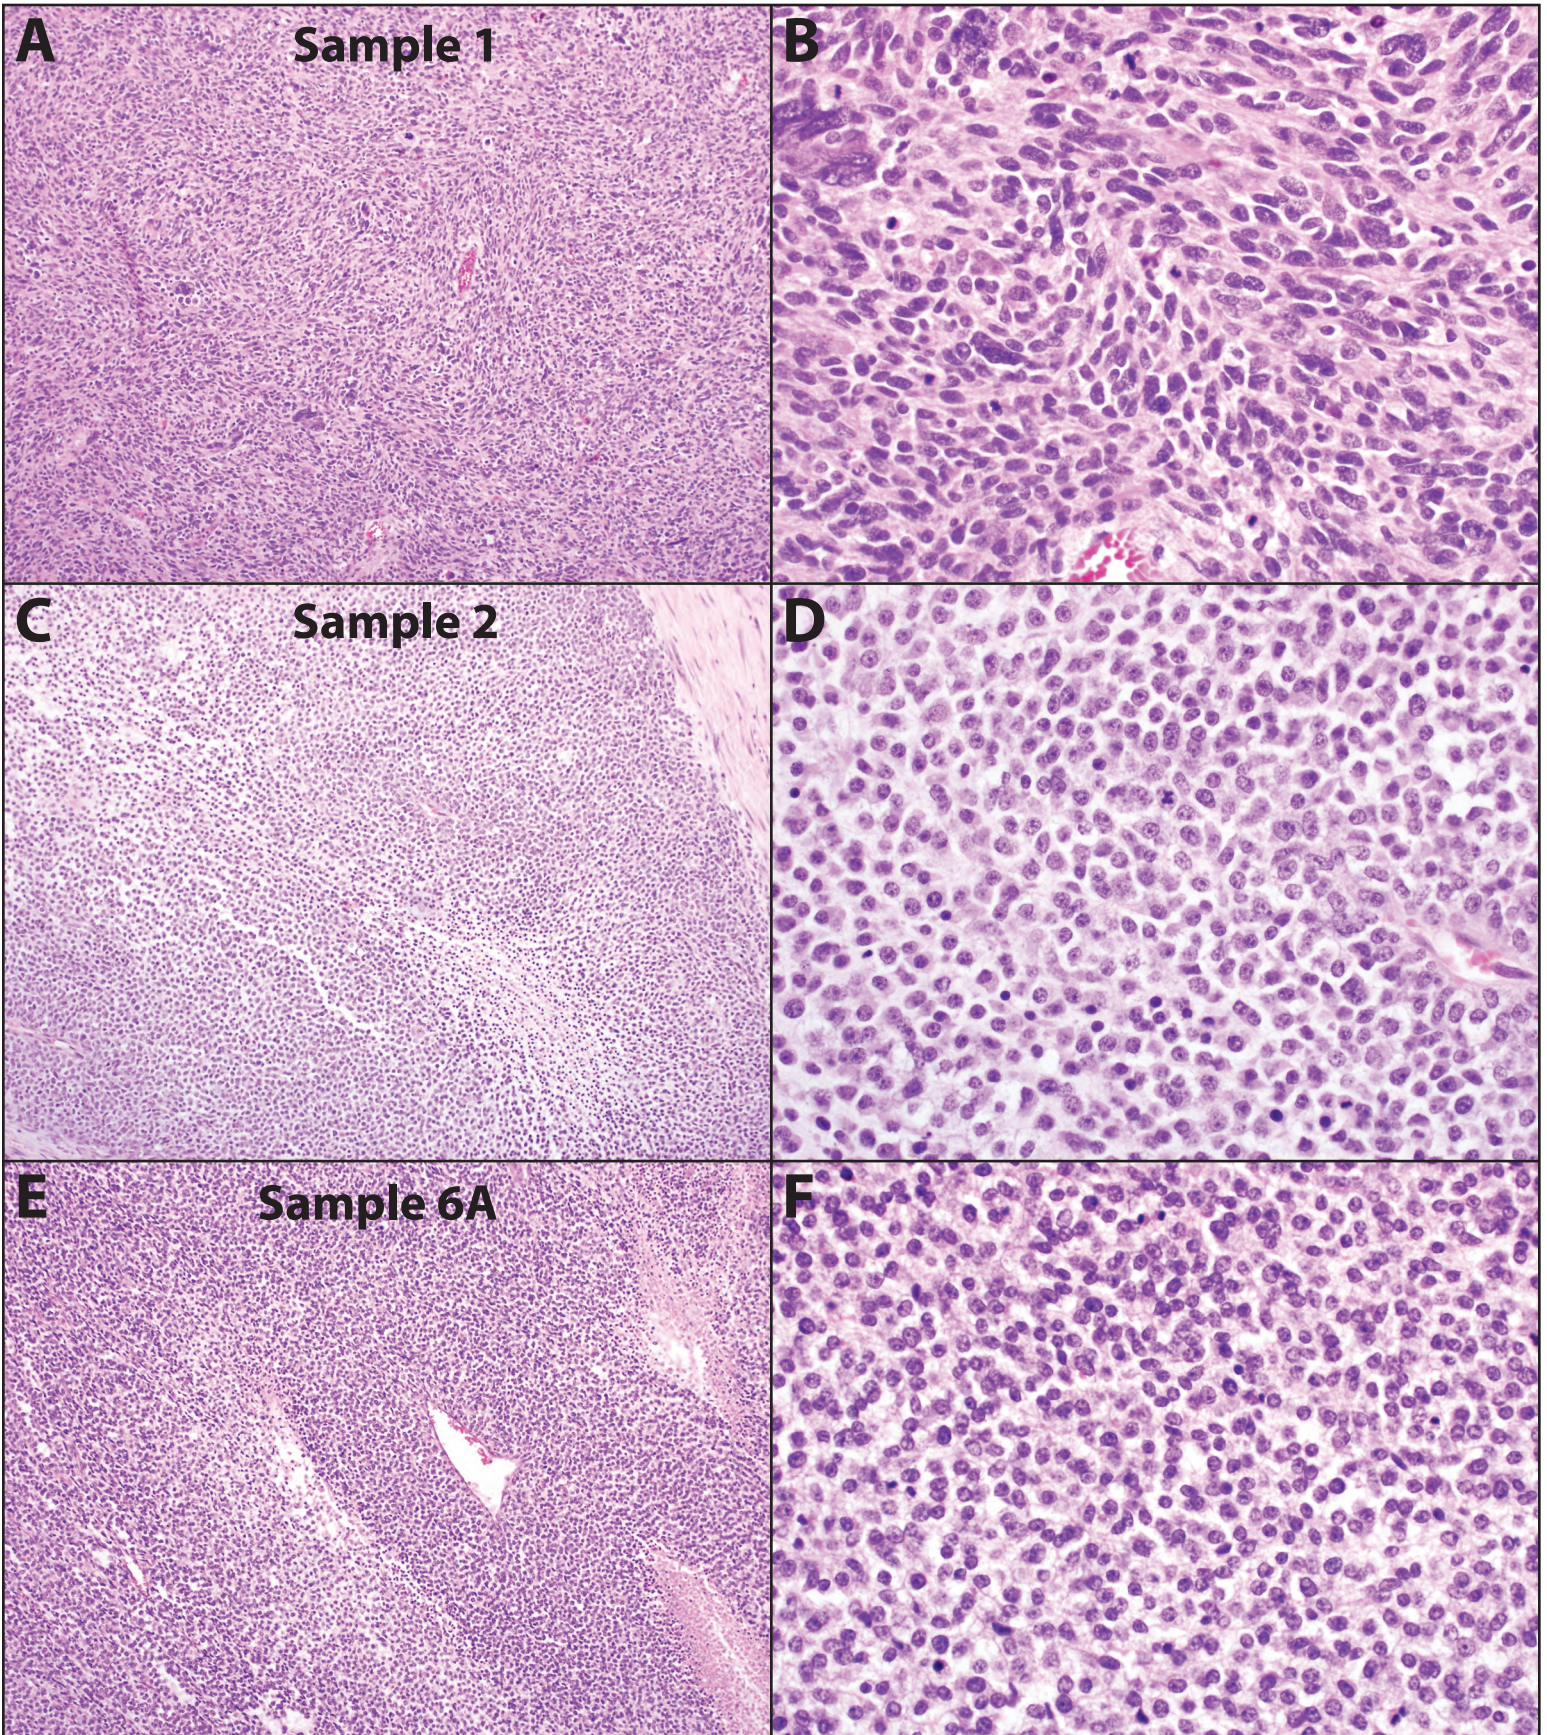

# Figure 2

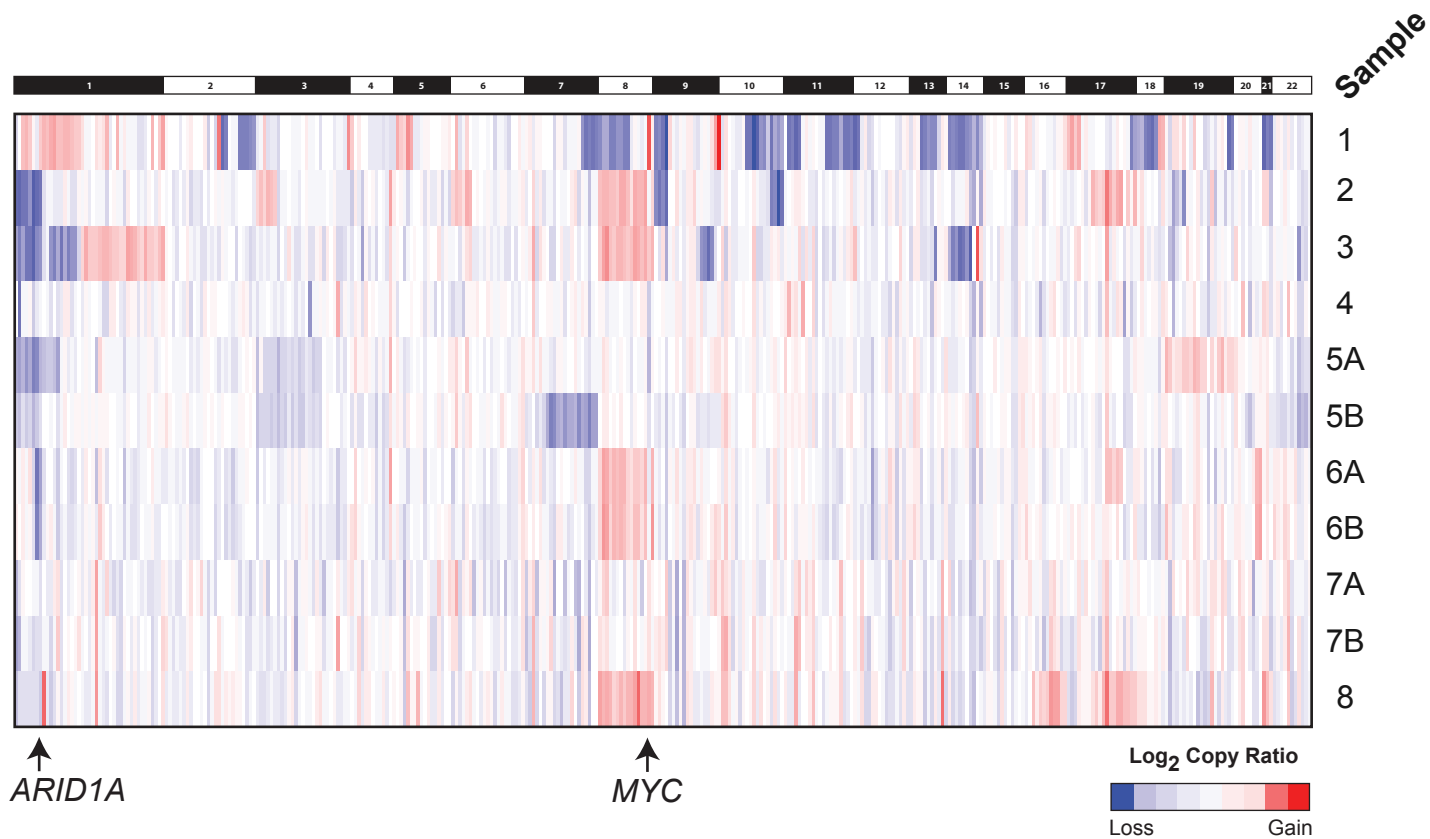

Supplement: NIHMS818442-supplement-1.pdf [file NIHMS818442-supplement-1.pdf]
